# Supplementary material
Source: PubMed Central journal article supplement (PMC3987895)
Supplement: NIHMS514409-supplement-supplement_1.pdf [file NIHMS514409-supplement-supplement_1.pdf]

## **SUPPLEMENTARY INFORMATION**

# **Differentiation stage determines reprogramming potential of hematopoietic cells into iPS cells**

**Sarah Eminli<sup>\*</sup>, Adlen Foudi<sup>\*</sup>, Matthias Stadtfeld, Nimet Maherali, Tim Ahfeldt, Gustavo Mostoslavsky, Hanno Hock, Konrad Hochedlinger**

### **CONTENTS**

1. Supplementary Figures 1-8
2. Supplementary Table 1

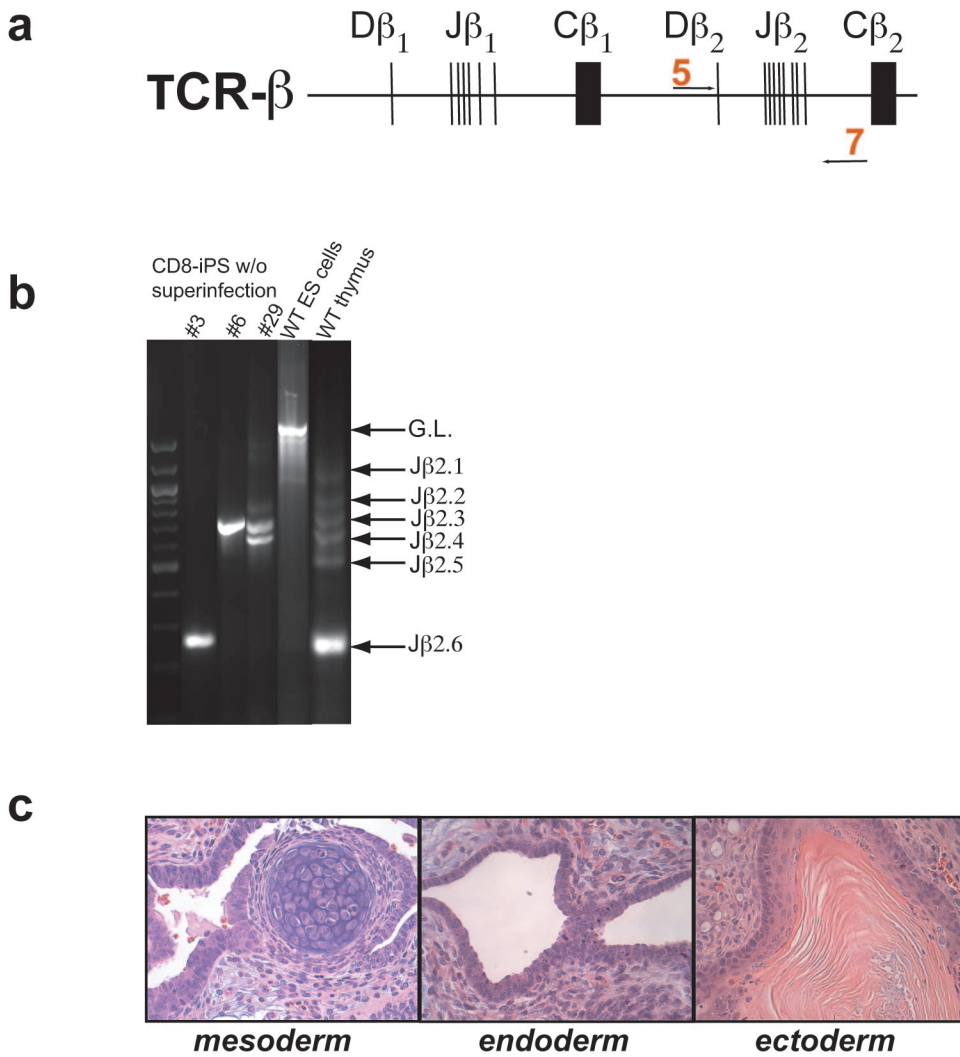

**Supplementary Figure 1.** Generation of iPS cells from fetal liver-derived CD8<sup>+</sup> T cells in the absence of superinfection. **(a)** Schematic of TCR $\beta$  locus showing primer binding sites (5,7) to detect D $\beta$ 2-J $\beta$ 2 rearrangements. **(b)** TCR $\beta$  D-J rearrangements by PCR on DNA isolated from three different CD8-iPS cell lines derived without lentiviral superinfection (compare Figure 3D, b), **(c)** Hematoxylin and eosin (H&E) staining of a representative teratoma section derived from such CD8-iPS cells shows pluripotency.

**a**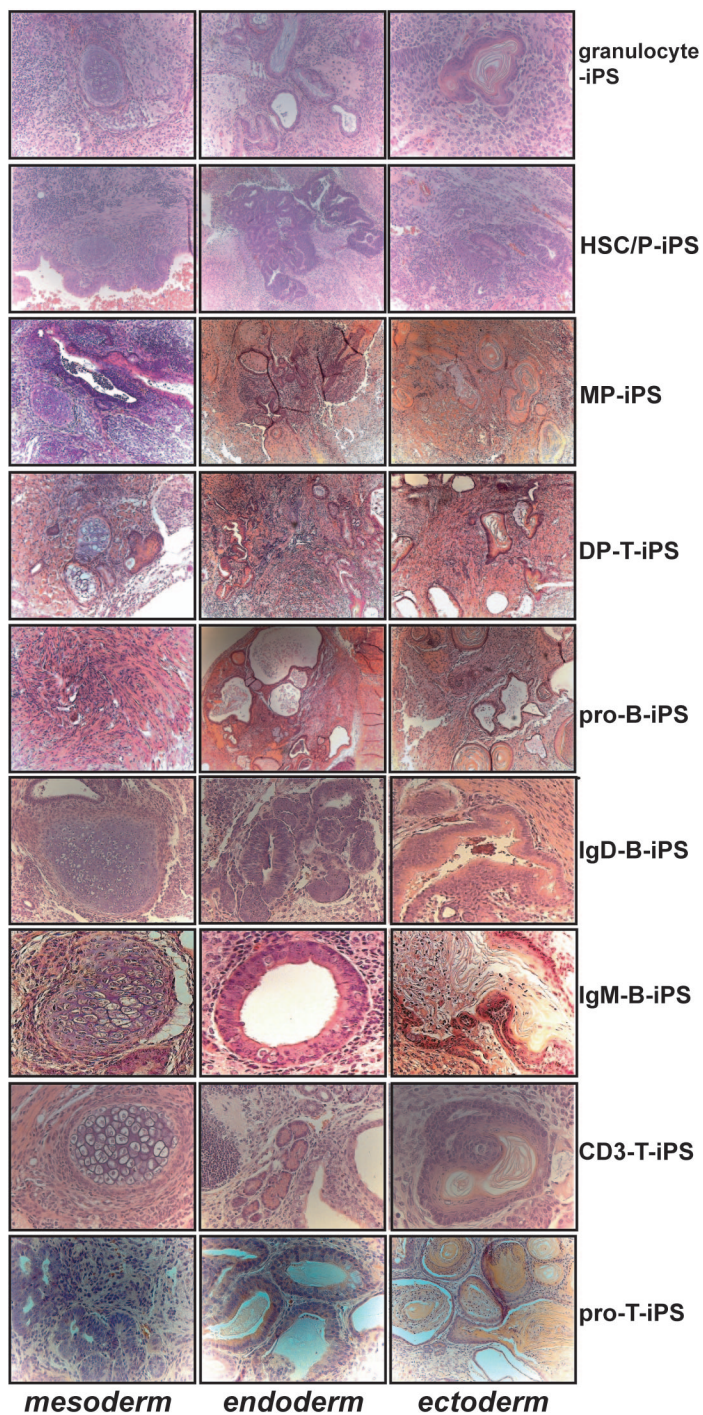**b**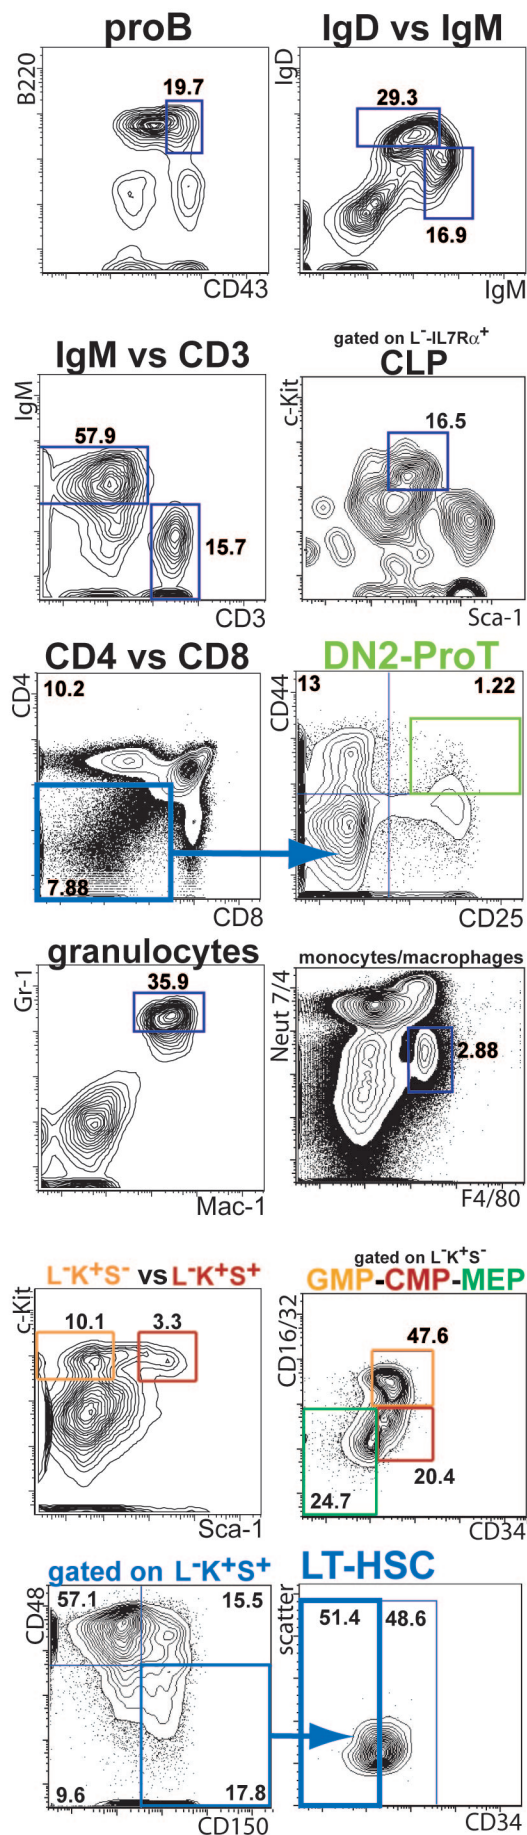

**Supplementary Figure 2.** Gating strategies for different hematopoietic cell types and differentiation potential of resultant iPS cell lines. **(a)** H&E staining of representative teratoma sections derived from iPS cell lines generated from different cells of the hematopoietic system. **(b)** Representative graphs of FACS plots indicate the gating strategies used in this study. Cells were stained as described in material and methods and isolated from BM (LT-HSCs, HSC/Ps, MPs, CLPs, CMPs, MEPs, GMPs pro-Bs, granulocytes and macrophages), spleen (mature B and T cells), lymph nodes (mature B cells, not shown) and thymus (immature T cell populations).

**Supplementary Figure 2**



**a**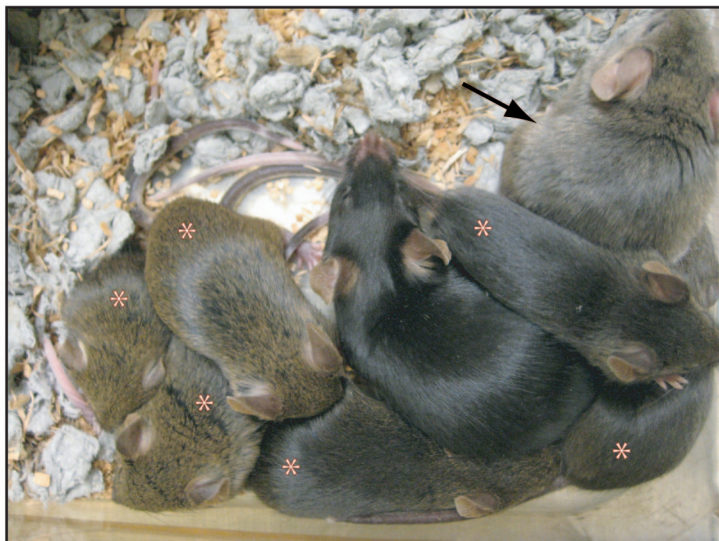**b**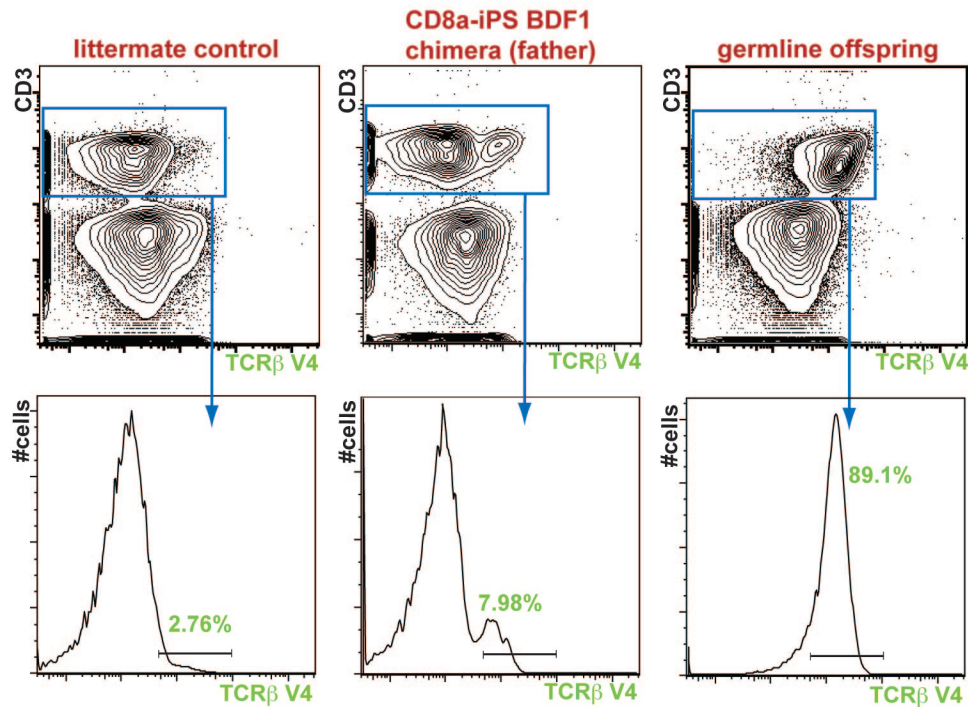

**Supplementary Figure 3.** Germline transmission of CD8-iPS chimeras. **(a)** Shown are a high-degree male chimera derived from CD8-iPS cells (arrow), a BDF1 female (black coat color) and their germline offspring (red asterisks). Note that all offspring are agouti-colored, indicating 100% germline transmission. **(b)** Molecular verification of germline transmission and monoclonality of lymphoid system. FACS plots to detect the functionally rearranged TCRβ allele (Vβ4.1) in Vβ4.1-negative littermate control (left), CD8-iPS male chimera (center) and one Vβ4.1-positive germline offspring (right). Note the increased fraction of Vβ4.1-positive cells in the chimera and the monoclonal expression of Vβ4.1 in CD3<sup>+</sup> T cells of one offspring.



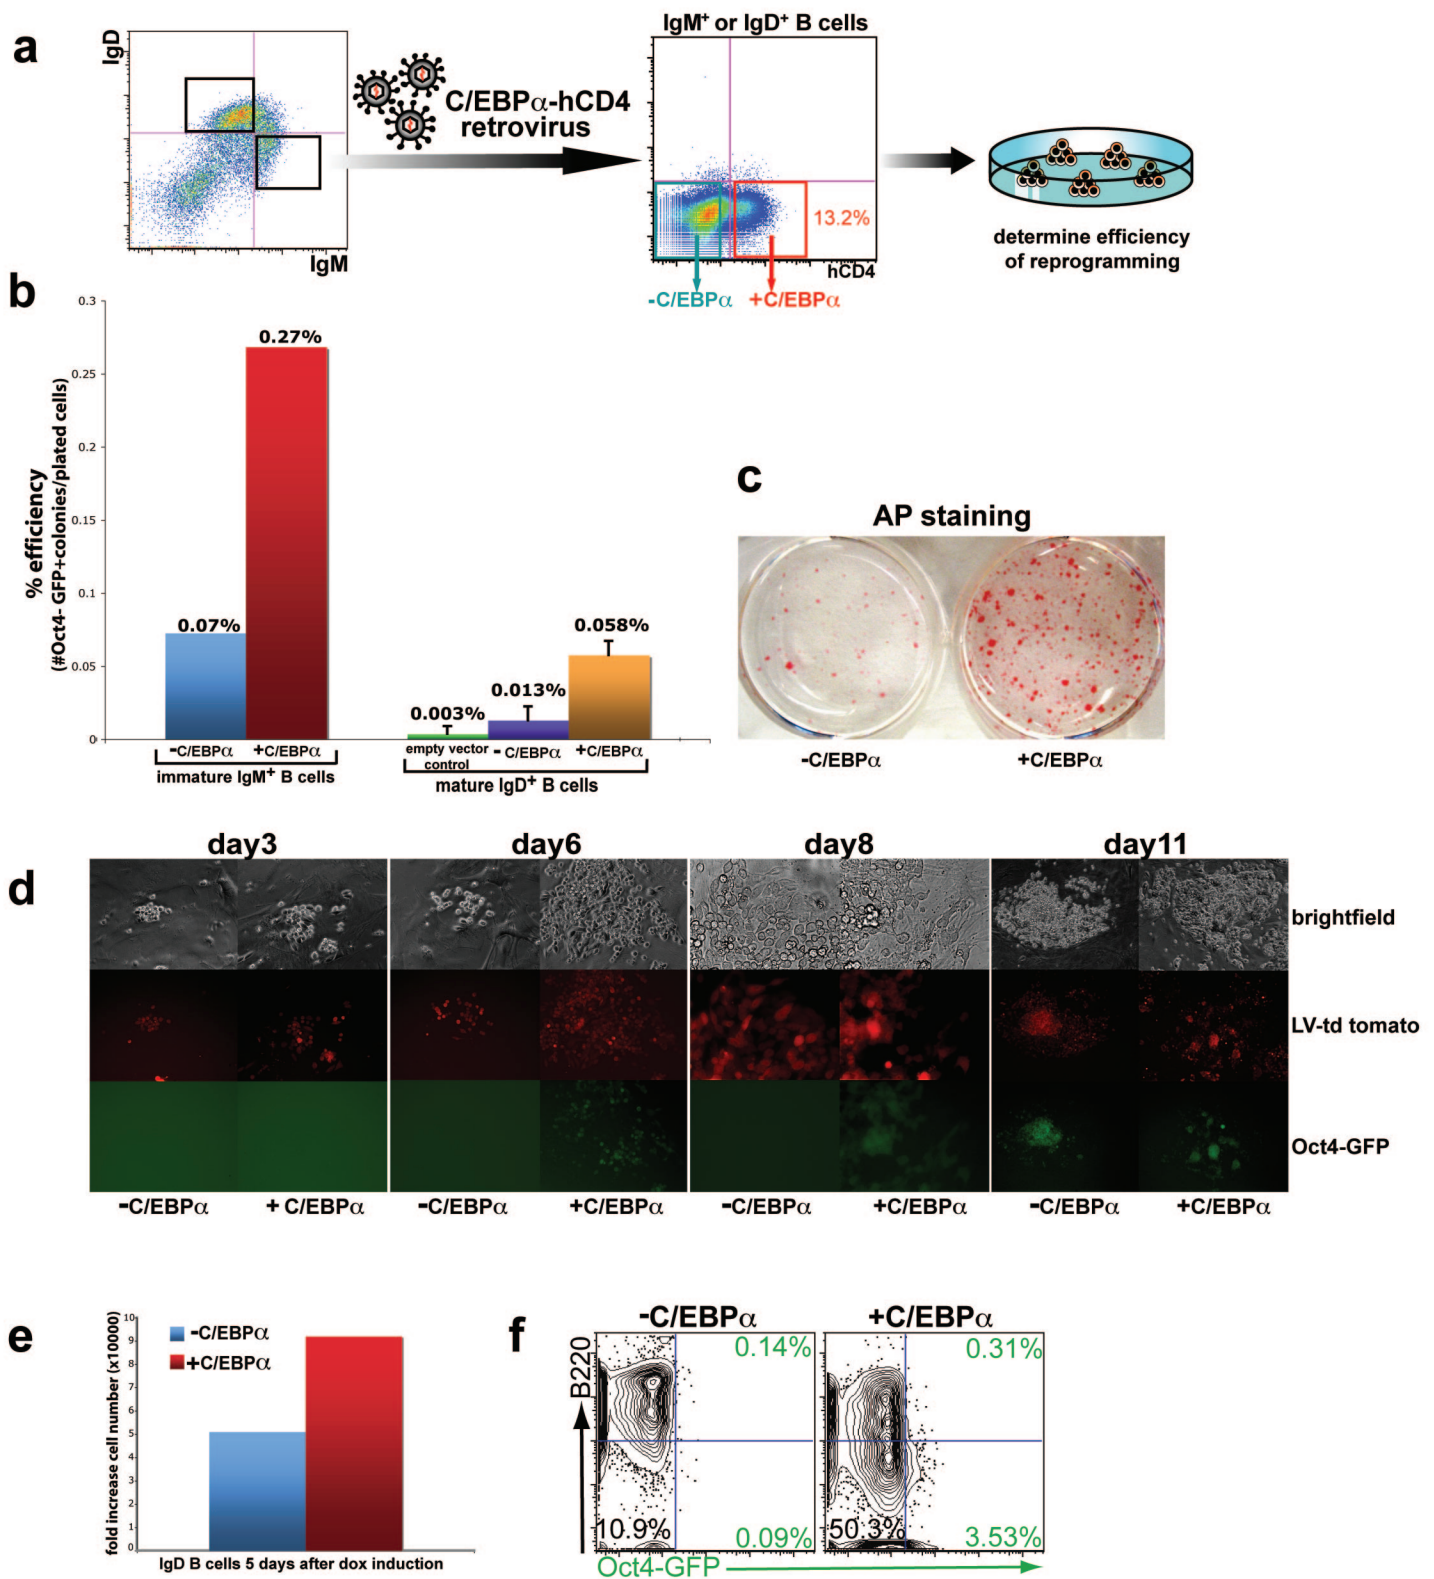

**Supplementary Figure 4.** Ectopic C/EBP $\alpha$  expression enhances basal reprogramming efficiency of B lymphocytes into iPS cells. (a) IgD<sup>+</sup> and IgM<sup>+</sup> splenocytes were isolated by FACS from adult CD8-iPS chimeras and infected with retrovirus encoding a C/EBP $\alpha$ -hCD4 cassette. (b) Number of Oct4-GFP<sup>+</sup> iPS colonies derived from IgM<sup>+</sup> and IgD<sup>+</sup> B cells in the presence (+) or absence (-) of C/EBP $\alpha$  expressing virus. Note that there is a 5-to-20-fold increase in reprogramming efficiency of B lymphocytes expressing C/EBP $\alpha$  over uninfected cells or cells infected with an empty control virus. (c) Alkaline phosphatase (AP) staining of iPS colonies emerging from IgD cells in the presence of absence of C/EBP $\alpha$ -expressing virus. (d) C/EBP $\alpha$ -expressing B cells undergo faster reprogramming. Shown are images of emerging iPS colonies in the presence and absence of virus. Note the appearance of Oct4-GFP<sup>+</sup> colonies by day 6 in C/EBP $\alpha$ -expressing cells compared with uninfected controls. (e) C/EBP $\alpha$ -expressing B cells proliferate more. Bars represent fold increase of the number of cells counted 5 days after doxycycline induction relative to the number plated at day 0 (not shown). (f) C/EBP $\alpha$  expression accelerates reprogramming of B cells. C/EBP $\alpha$ -expressing B cells downregulate the B cell marker B220 and activate Oct4-GFP sooner compared with uninfected controls at day 5 after dox induction.

**a**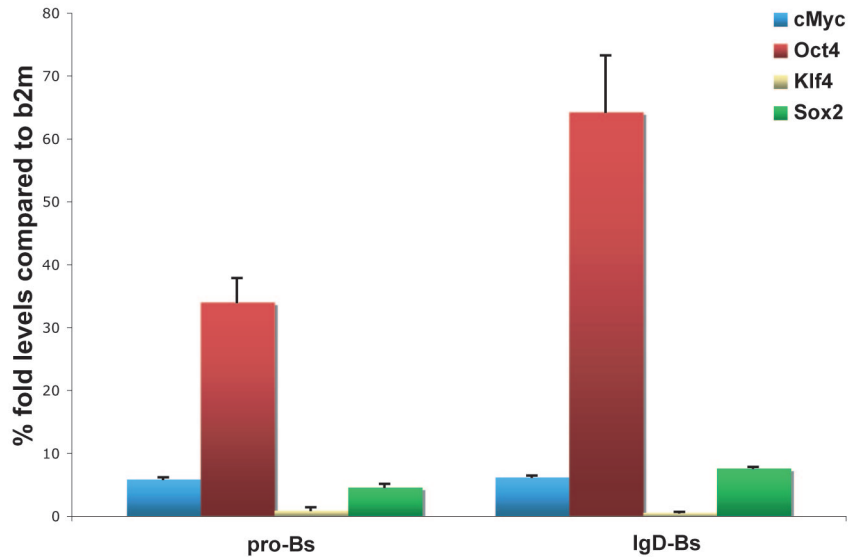**b**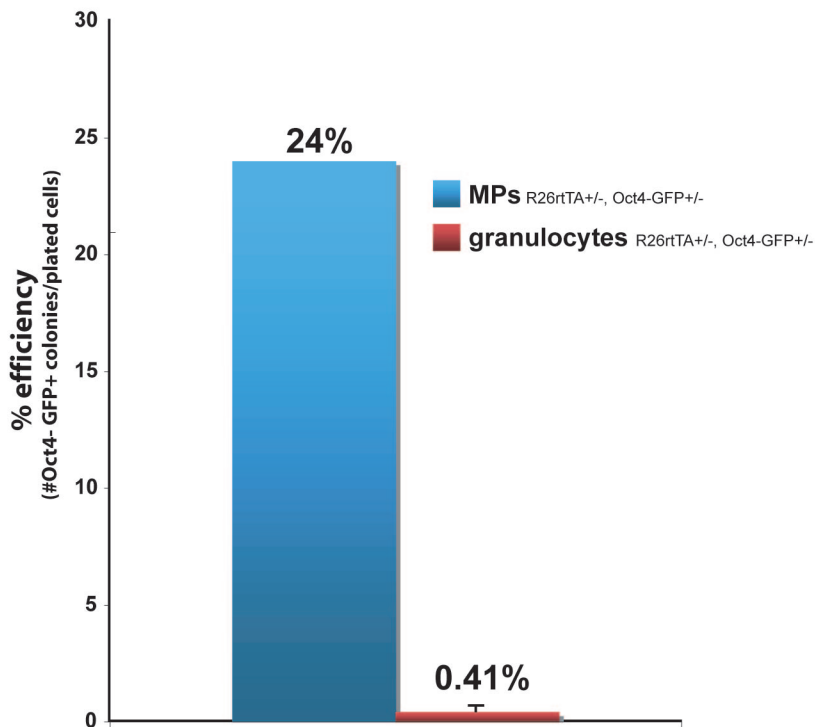

**Supplementary Figure 5.** Transgene expression in pro-B cells vs. B cells and reprogramming efficiencies of MPs and granulocytes upon direct viral infection. **(a)** Quantitative RT-PCR to detect viral transgene expression in chimera-derived pro-Bs and IgM<sup>low</sup> IgD<sup>high</sup> B cells treated with dox for 48h. Average expression levels and standard deviation from two different experiments (triplicate reactions) are shown for all four factors. **(b)** Efficiencies of iPS cell formation from MPs ( $5 \times 10^4$ ) and granulocytes ( $5 \times 10^4$ ) derived from a ROSA26-rtTA<sup>+/-</sup> Oct4-GFP<sup>+/-</sup> animal upon direct viral infection with a polycistronic lentivirus expressing Oct4, Sox2, Klf4 and cMyc. Reprogramming efficiencies were adjusted by measuring viral infection efficiencies with a GFP-expressing lentivirus.



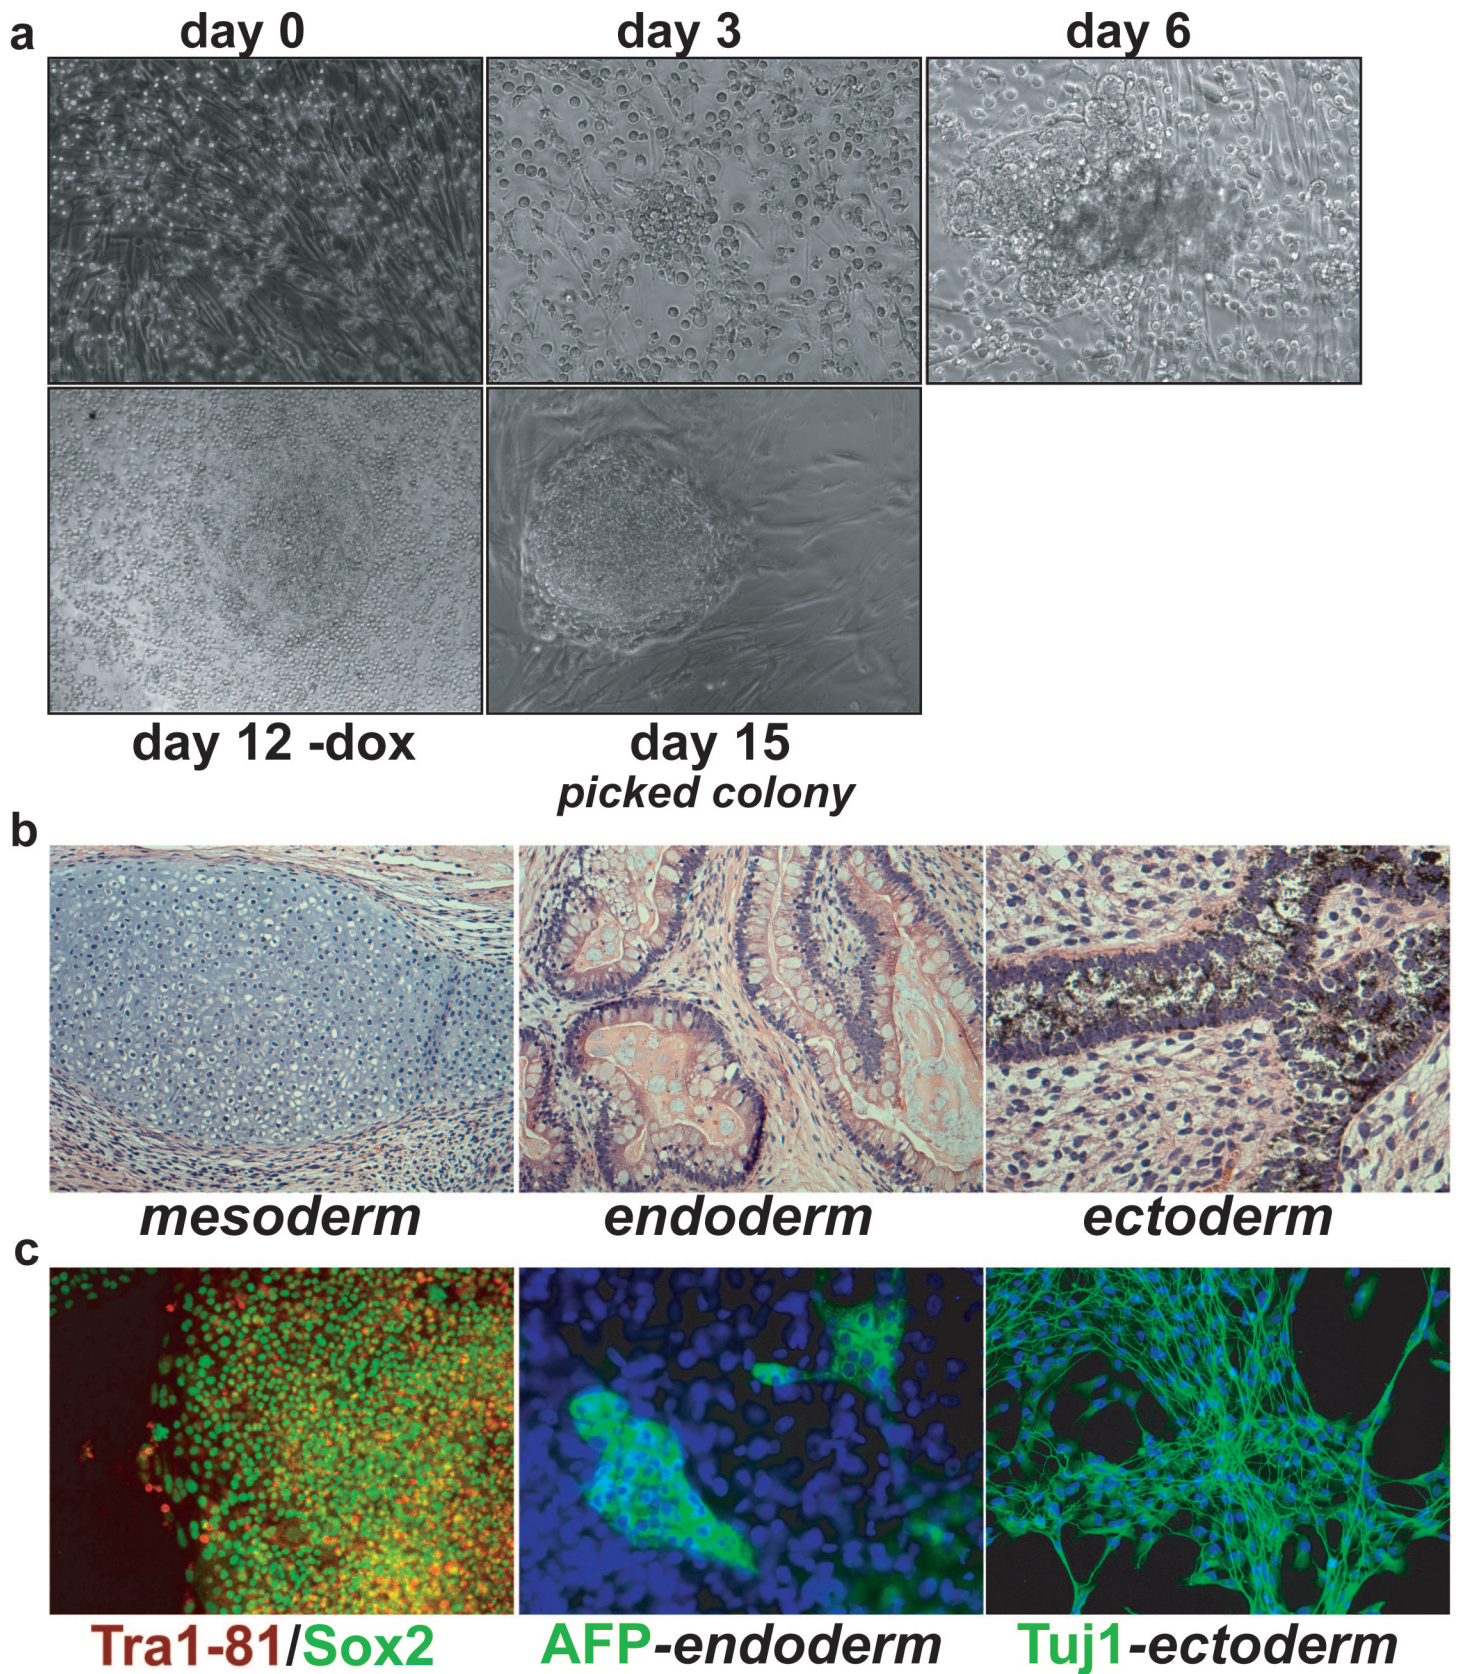

**Supplementary Figure 6.** Developmental potential of human CD34<sup>+</sup> cord blood cells. (a) Time course of morphological changes of human CD34<sup>+</sup> cord blood cells undergoing reprogramming. (b) H&E staining of representative teratoma sections from human CD34-iPS cells (mesoderm-cartilage, endoderm- gut-like epithelium/goblet-cells, ectoderm-melanocytes). (c) Immunostaining of pluripotency markers Tra1-81 (PE) and Sox2 (FITC), endoderm marker alpha-feto-protein (AFP-FITC) and ectoderm marker Neuron-specific class III  $\beta$ -tubulin (Tuj1-FITC). Nuclei are shown in DAPI (blue).



**a**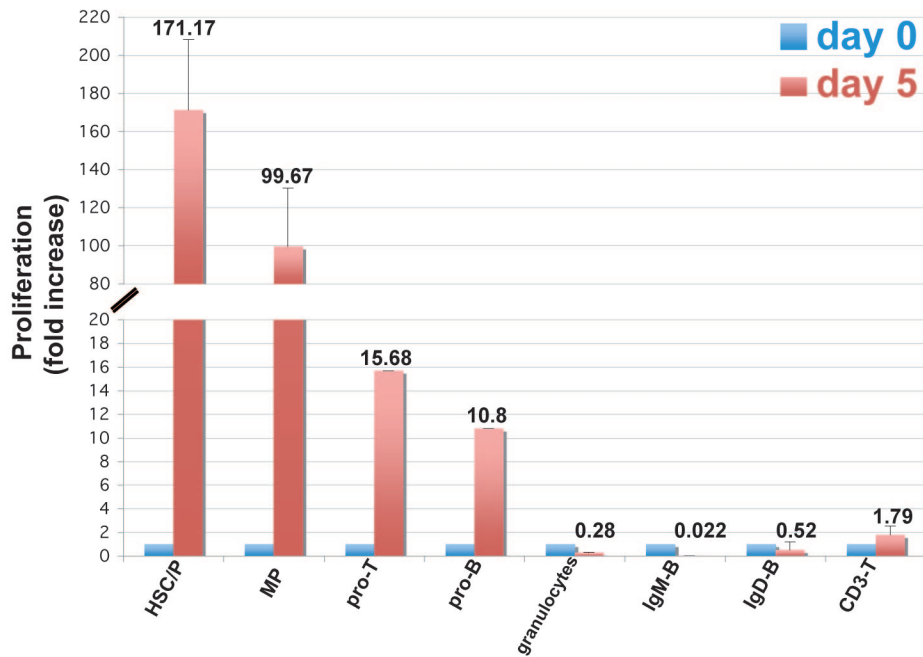**b**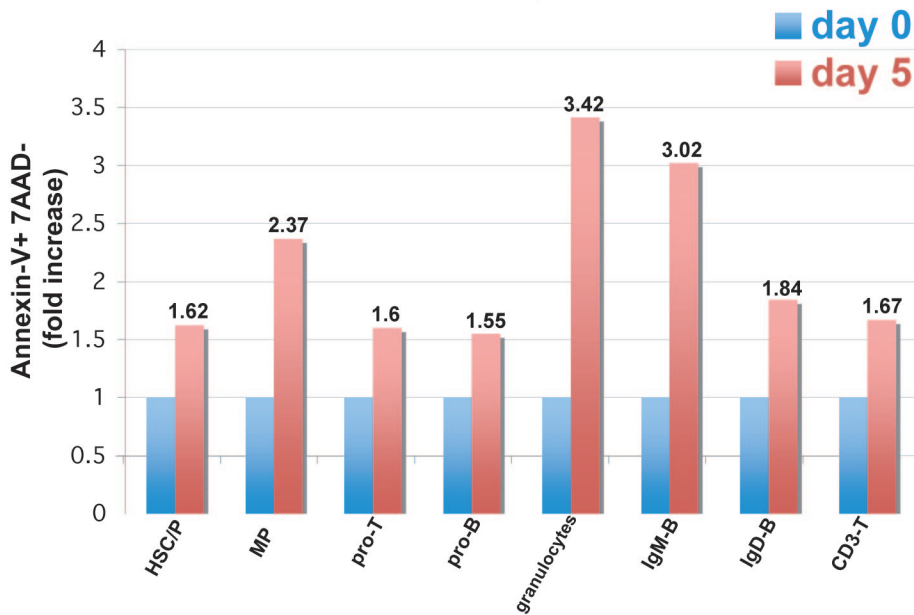

**Supplementary Figure 7.** Measurement of proliferation and apoptosis in immature and mature blood cell types. **(a-b)** iPS-derived hematopoietic cells were isolated by FACS and cultured *in vitro* as described in materials and methods.  $5 \times 10^3$  to  $2 \times 10^6$  cells were plated at day 0 and cultured under normal growth conditions in the presence of cytokines. **(a)** After 5 days, trypan blue negative cells were counted using a hemacytometer. Bars represent fold increase or decrease of the number of cells counted 5 days later (red bars) relative to the number plated at day 0 (blue bars). **(b)** Apoptosis assay was performed on day 0 and day 5 in these cultures, as described in materials and methods. Bars represent the fold increase of the percentage of Annexin-V+7-AAD- apoptotic cells (dead cells excluded) observed at day 5 (red bars) relative to day 0 (blue bars). Bars represent mean  $\pm$  SD. Numbers above each bar represents the mean value for that sample.

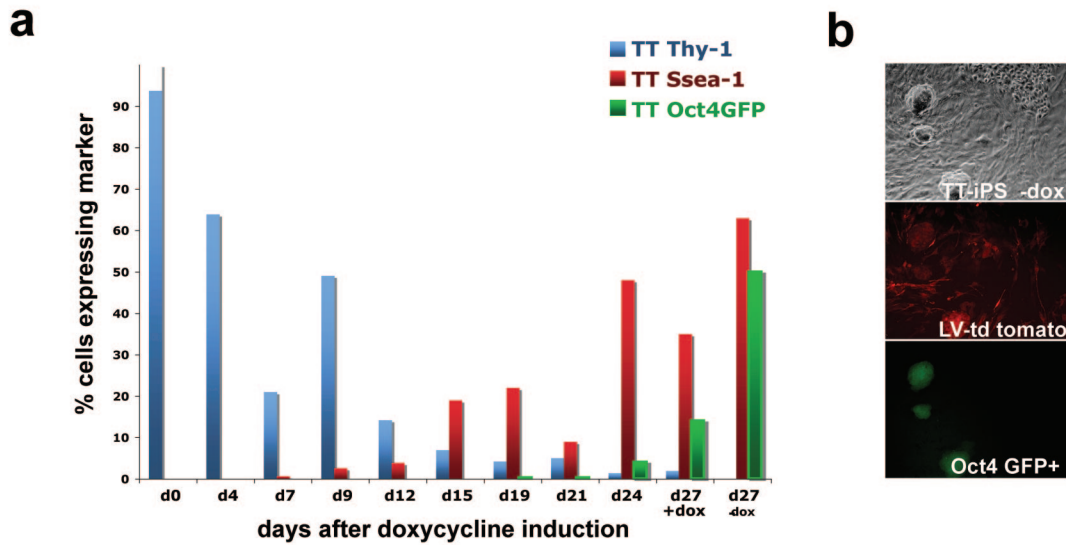

**Supplementary Figure 8.** Reprogramming kinetics of tail fibroblasts from CD8-iPS chimeras. **(a)** Time course of Thy-1 and SSEA-1 surface marker expression and Oct4-GFP activity in tdTomato positive sorted tail-tips (TT) fibroblasts derived from CD8-iPS chimera undergoing reprogramming as determined by FACS. **(b)** ES cell morphology of tdTomato- and Oct4-GFP expressing iPS cells derived from TT fibroblasts at day 27, following discontinuation of doxycycline treatment.

| <b>RT-PCR primer 5'-3' sequence</b> |                          |
|-------------------------------------|--------------------------|
| 3' tetO-myc                         | AAGAGGACTTGTTGCGGAAA     |
| 5' tetO-myc                         | TTGTAATCCAGAGGTTGATTATCG |
| 3' tetO-Klf4                        | ATGGTCAAGTCCCAGCAAG      |
| 5' tetO-Klf4                        | TGATATCGAATTCCGTTTGTTT   |
| 3' tetO-Oct4                        | AGTTGGCGTGGAGACTTTGC     |
| 5' tetO-Oct4                        | CAGGGCTTTCATGTCCTGG      |
| 3' tetO-Sox2                        | GGCCATTAACGGCACACT       |
| 5' tetO-Sox2                        | AAGCAGCGTATCCACATAGC     |
| 3' b2m                              | TTCTGGTGCTTGTCTCACTGA    |
| 5' b2m                              | CAGTATGTTCCGGCTTCCCATTC  |

**Supplementary Table 1.** Real-time quantitative PCR primer sequences.
